# Supplementary material for: Structural and biophysical correlation of anti-NANP antibodies with in vivo protection against P. falciparum
Source: PubMed Central journal article supplement (PMC7887213; doi:10.1038/s41467-021-21221-4), 2021-02-16
Supplement: 41467_2021_21221_MOESM1_ESM.pdf [file 41467_2021_21221_MOESM1_ESM.pdf]

**Supplemental Information for**  
**Structural and biophysical correlation of anti-NANP antibodies**  
**with *in vivo* protection against *P. falciparum***

**Tossapol Pholcharee<sup>1</sup>, David Oyen<sup>1†</sup>, Yewel Flores-Garcia<sup>2</sup>, Gonzalo Gonzalez-Paez<sup>1</sup>, Zhen Han<sup>1‡</sup>, Katherine L. Williams<sup>3</sup>, Daniel Emerling<sup>3</sup>, Wayne Volkmuth<sup>3</sup>, Emily Locke<sup>4</sup>, C. Richter King<sup>4</sup>, Fidel Zavala<sup>2</sup>, Ian A. Wilson<sup>1,5\*</sup>**

<sup>1</sup>Department of Integrative Structural and Computational Biology, The Scripps Research Institute, La Jolla, CA 92037, USA.

<sup>2</sup>Malaria Research Institute, Johns Hopkins Bloomberg School of Public Health, Baltimore, MD 21204, USA.

<sup>3</sup>Atreca Inc., South San Francisco, CA 94080, USA.

<sup>4</sup>PATH's Malaria Vaccine Initiative, Washington, DC 20001, USA.

<sup>5</sup>The Skaggs Institute for Chemical Biology, The Scripps Research Institute, La Jolla, CA 92037, USA.

\*Corresponding author: Email: wilson@scripps.edu (I.A.W.)

†Current address: Pfizer Inc., San Diego, CA 92121, USA.

‡Current address: Wondfo USA Co., Ltd., San Diego, CA 92121, USA.

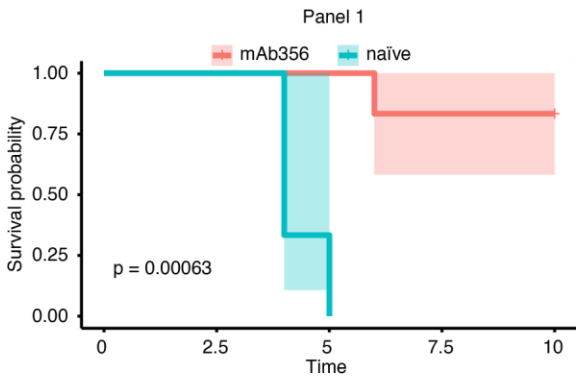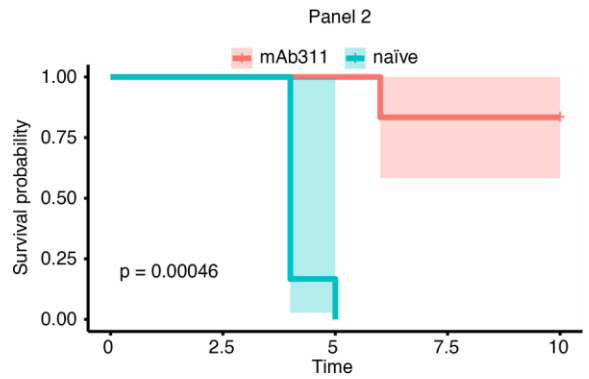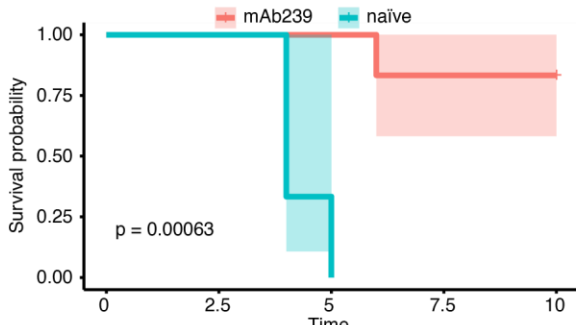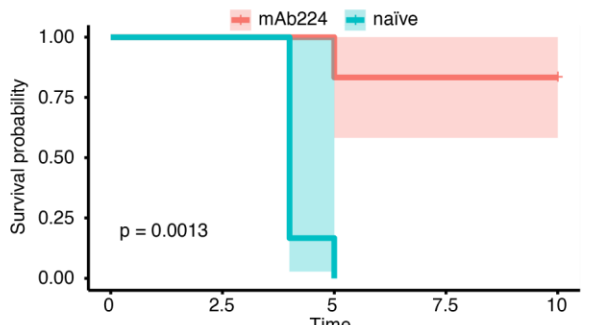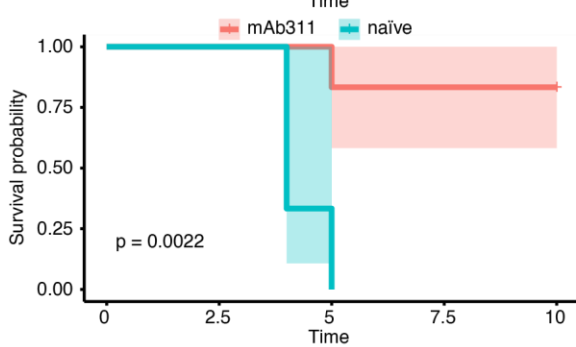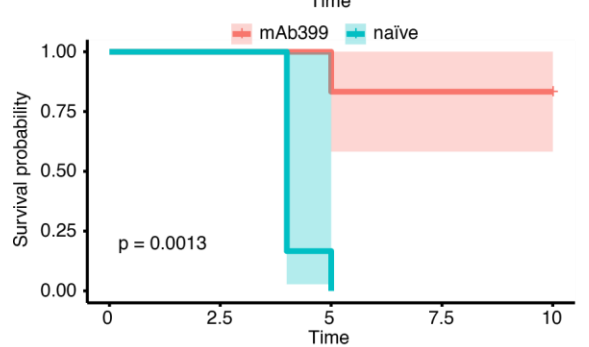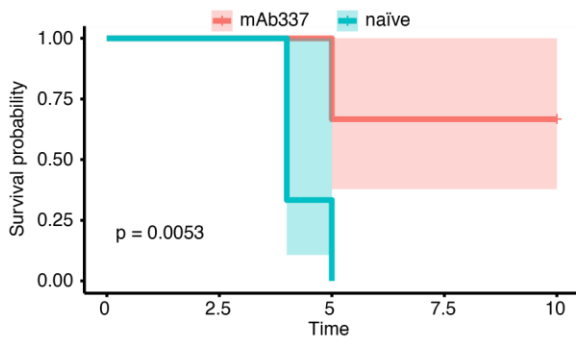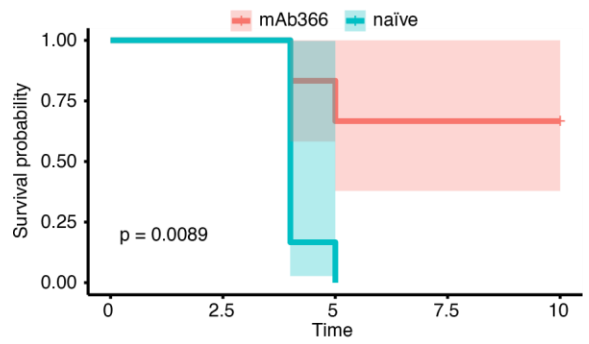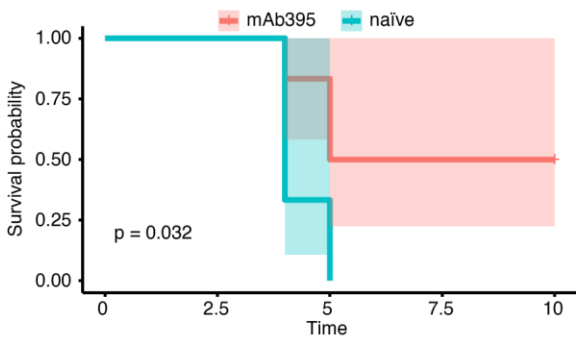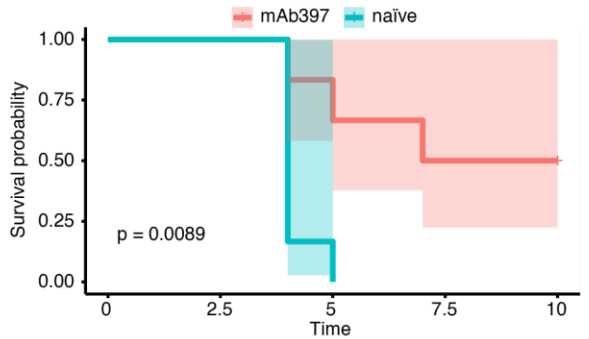

**Supplementary Fig. 1. Individual survival curves from the parasitemia assay with 300 µg antibody.** Parasite-free mice were passively immunized with 300 µg of the indicated antibody before challenge with bites from infected mosquitoes and compared to naïve control mice. A log rank test was used, and the p-value is shown. The shaded area indicates the 95% confidence interval ( $N = 6$ ). Source data are provided as a Source Data file.

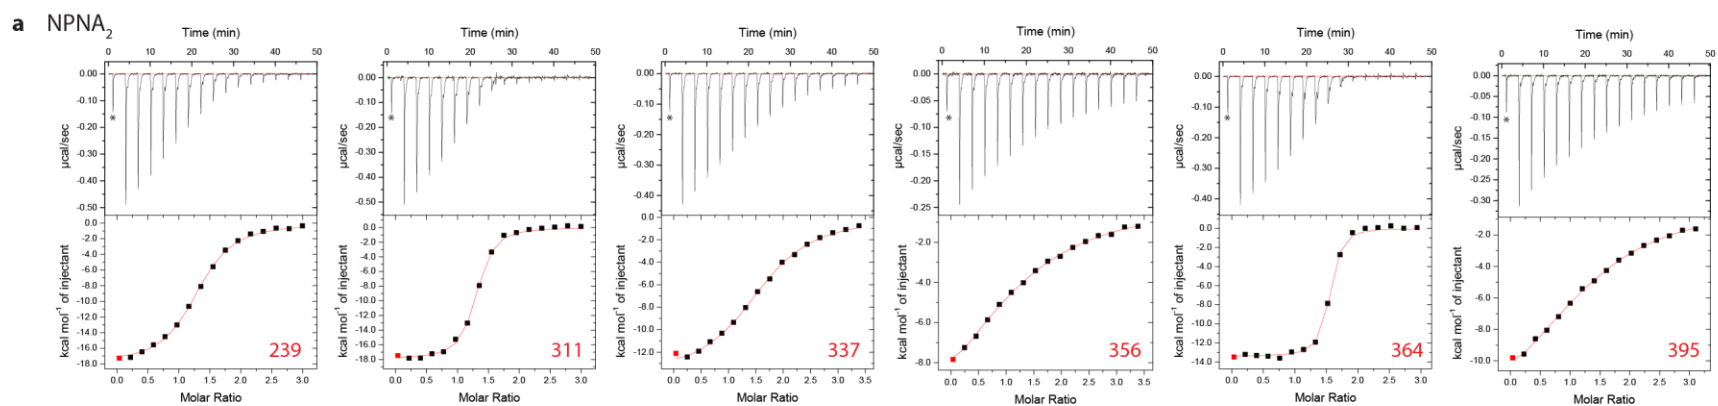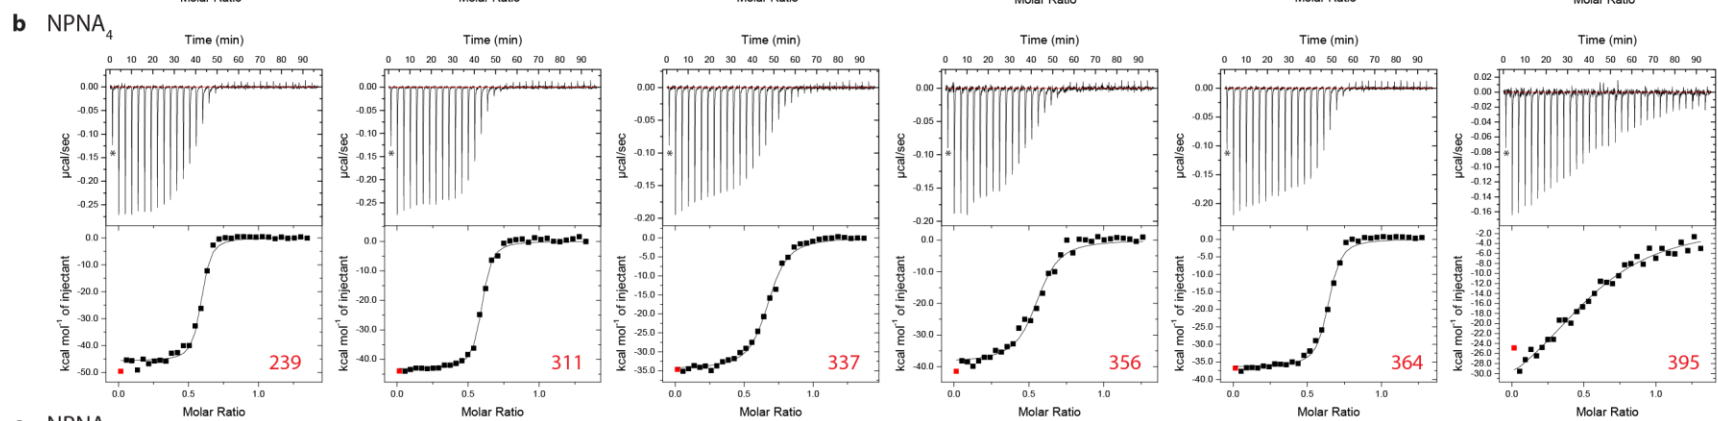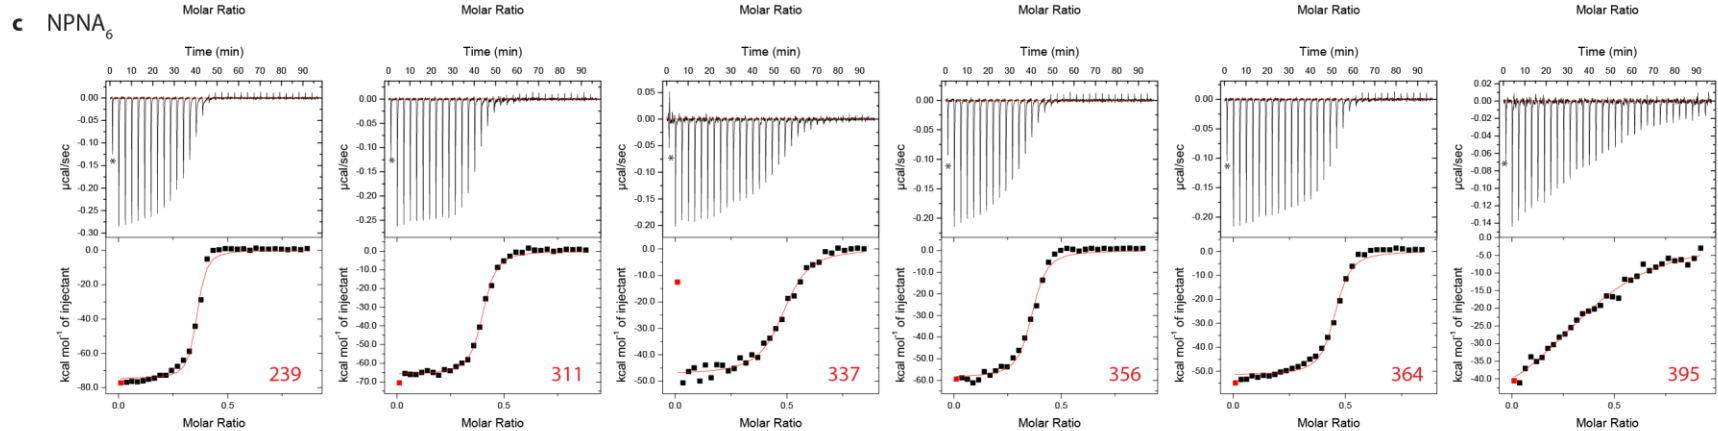

**Supplementary Fig. 2. ITC binding curves for *IGHV3-33* Fabs.** ITC binding data are shown for each indicated Fab with: **a** 8-mer peptide Ac-NPNANPNA-NH<sub>2</sub>, **b** 16-mer peptide Ac-NPNANPNA NPNANPNA-NH<sub>2</sub>, and **c** 24-mer Ac-NPNANPNA NPNANPNA NPNANPNA-NH<sub>2</sub>. The first data point is not included in the fit as is standard practice and indicated by an asterisk and red square. Source data are provided as a Source Data file.

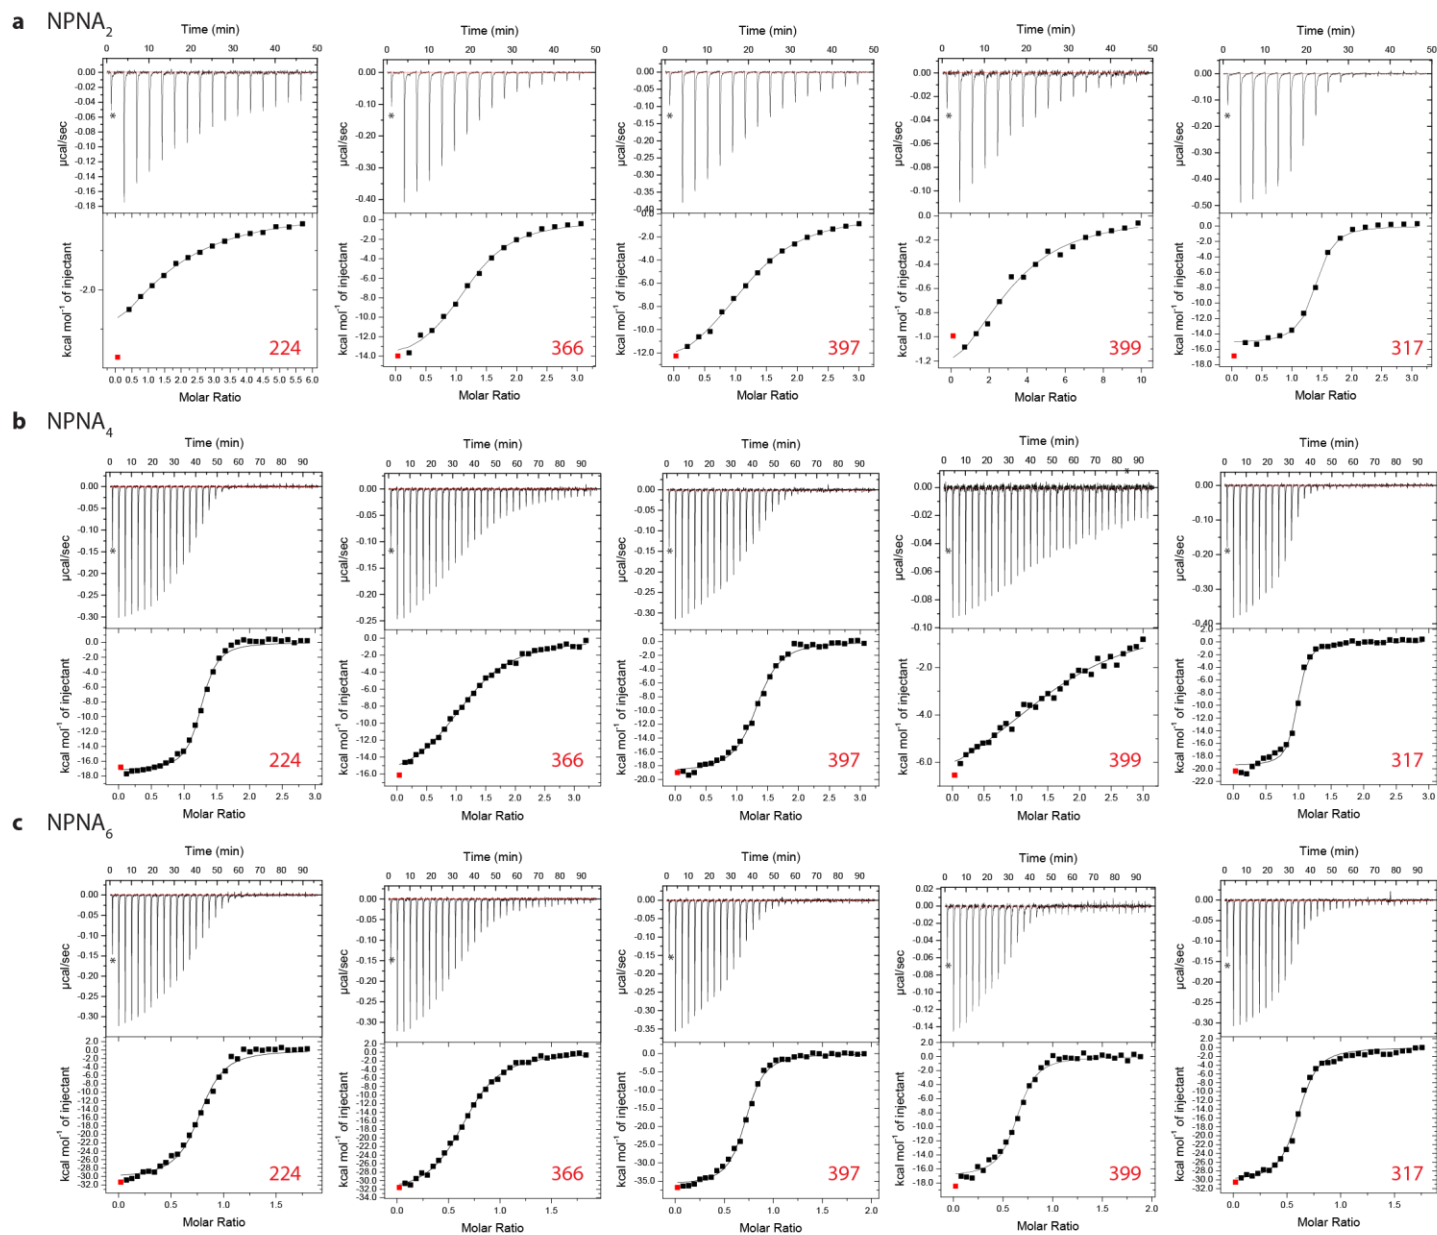

**Supplementary Fig. 3. ITC binding curves for Fab 224, 366, 397, 399, and 317.** ITC binding data are shown for each indicated Fab with: **a** 8-mer peptide Ac-NPNANPNA-NH<sub>2</sub>, **b** 16-mer peptide Ac-NPNANPNA NPNANPNA-NH<sub>2</sub>, and **c** 24-mer Ac-NPNANPNA NPNANPNA NPNANPNA-NH<sub>2</sub>. The first data point is not included in the fit as is standard practice and indicated by an asterisk and red square. Source data are provided as a Source Data file.

**a Fab239-peptide**

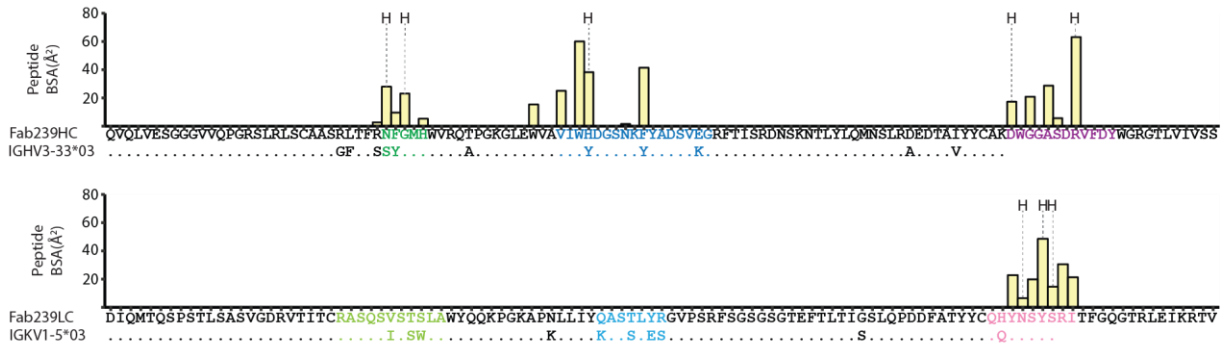

**b Fab399-peptide**

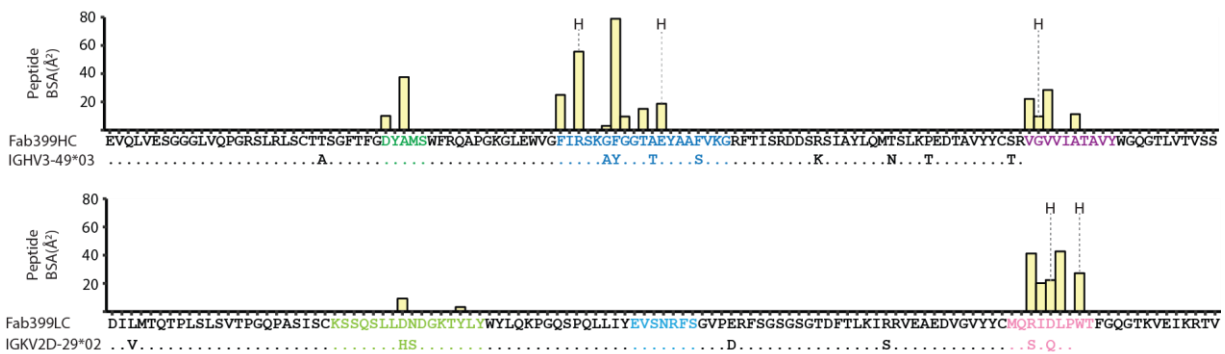

**Supplementary Fig. 4. Individual residue contributions to the BSA of the Fab-peptide interface.** The buried surface areas (BSAs) are shown in yellow bars for the heavy and light chains of **a** Fab239 and **b** Fab399. CDRs are colored as green, blue, magenta, light green, light blue, and pink for CDR H1, H2, H3, L1, L2, and L3, respectively. Additionally, the alignment between the Fab heavy/light chain sequences and germline *IGHV* and *IGKV* gene sequences also indicates which residues are somatically mutated. The letter “H” marks residues that are engaged in hydrogen bonds.



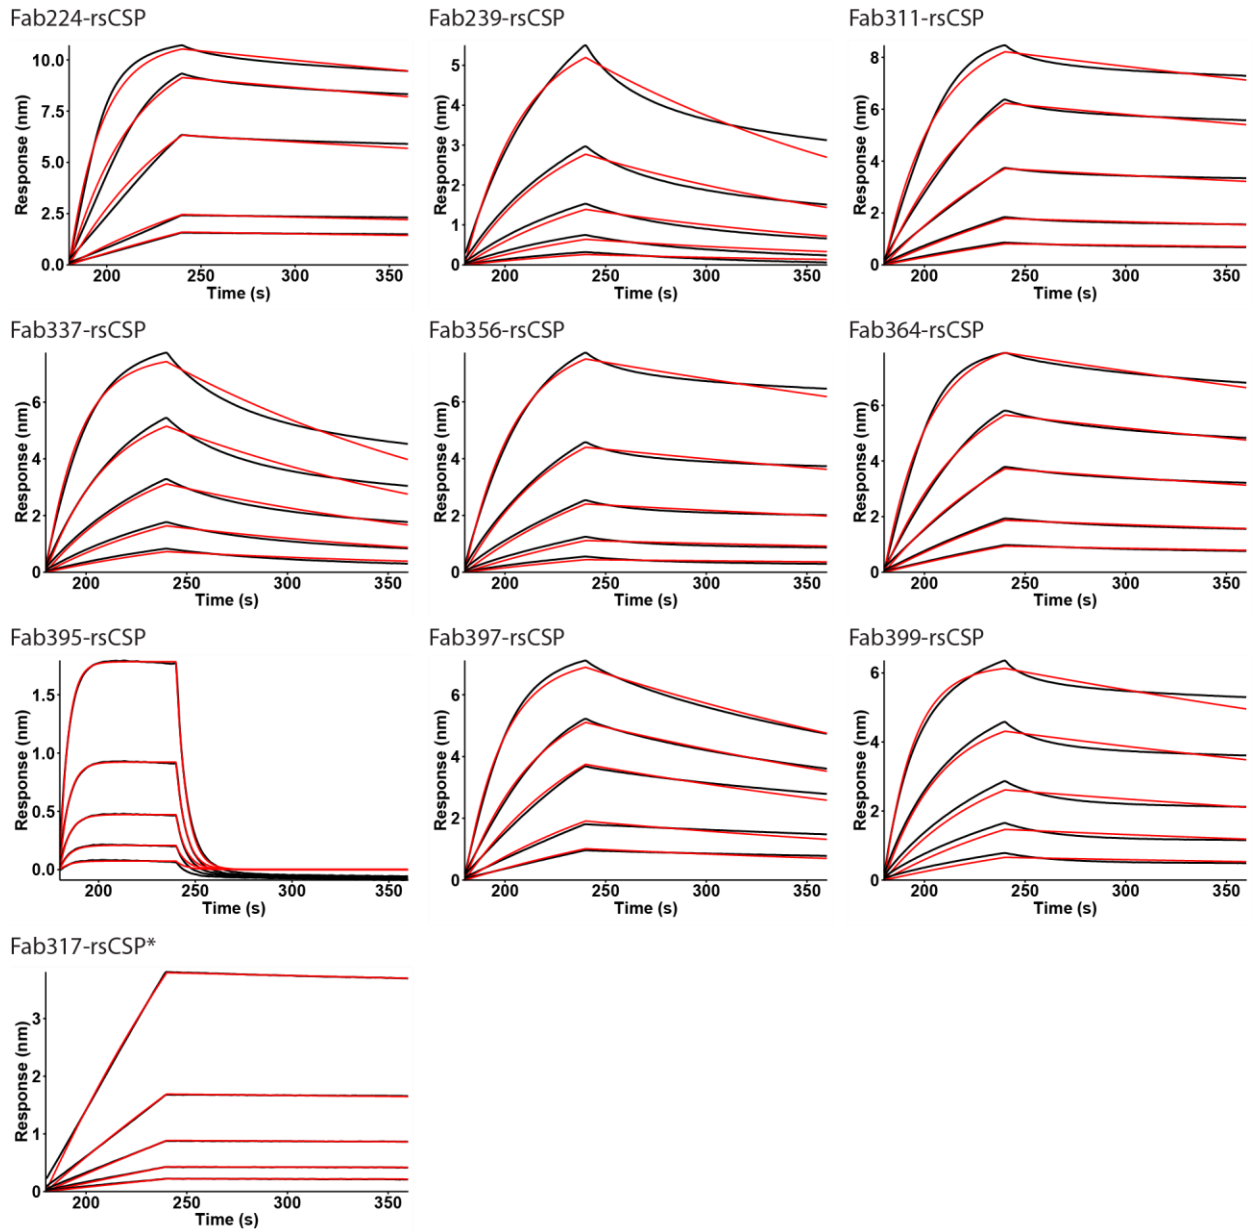

**Supplementary Fig. 5. Kinetics of binding for mAbs analyzed in this study with rsCSP.** Binding was assessed using bio-layer interferometry (BLI). Binding curves are shown in black and fitted curves (1:1 binding model) are shown in red. From the top to bottom curves, Fab concentrations are 1000, 500, 250, 125, and 62.5 nM, respectively (except for Fab317 where serial dilutions are 250, 125, 62.5, 31.25, 15.63 nM, respectively). Source data are provided as a Source Data file.

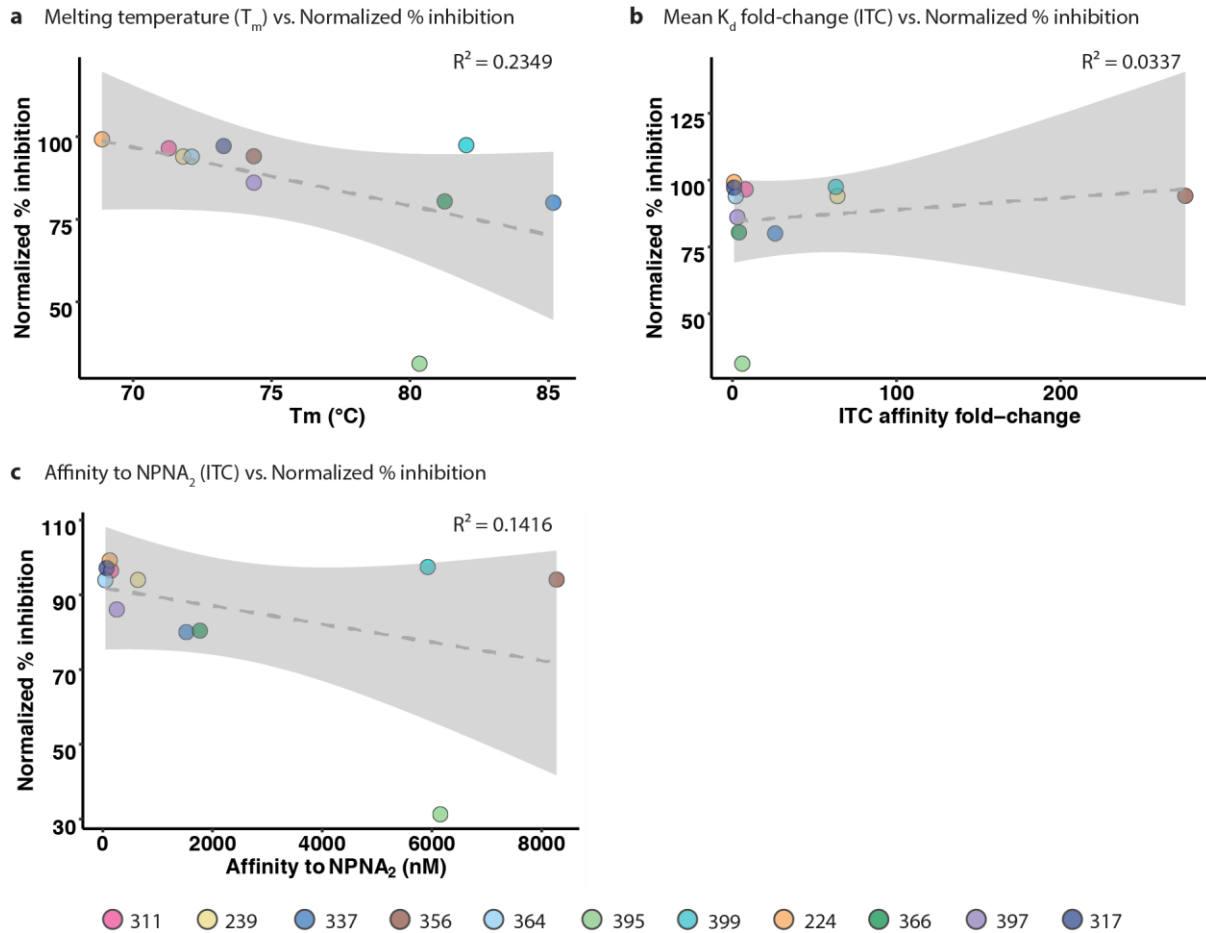

**Supplementary Fig. 6. Correlation of other parameters examined in this study with normalized parasite burden.** The linear regression graphs plot the % inhibition of the parasite liver burden load, normalized across the two mAb panels, against: **a** Antibody melting temperature ( $T_m$ ); **b** Mean  $K_d$  fold-change from ITC experiments (see also Table 1), and **c** Affinity against the NPNA<sub>2</sub> peptide from ITC. The dashed line indicates the fitted linear regression model with 95% confidence interval shaded in grey. Data points for each mAb are colored as shown. Source data are provided as a Source Data file.

**Supplementary Table 1. The  $p$ -values from pairwise comparison of mAbs in the liver burden assay (n = 5 mice) using the two-sided Mann-Whitney U test (\* $p = 0.0159$  or  $0.0318 < 0.05$ ) and \*\* $p = 0.0079 < 0.01$ ).**

| <b>Panel 1</b> | <b>Naïve</b> | <b>311</b> | <b>239</b> | <b>337</b> | <b>356</b> | <b>364</b> | <b>395</b> |
|----------------|--------------|------------|------------|------------|------------|------------|------------|
| <b>Naïve</b>   | -            |            |            |            |            |            |            |
| <b>311</b>     | 0.0079**     | -          |            |            |            |            |            |
| <b>239</b>     | 0.0079**     | 0.0556     | -          |            |            |            |            |
| <b>337</b>     | 0.0079**     | 0.0079**   | 0.0079**   | -          |            |            |            |
| <b>356</b>     | 0.0079**     | 0.1508     | 0.8413     | 0.0079**   | -          |            |            |
| <b>364</b>     | 0.0079**     | 0.1508     | 0.8413     | 0.0079**   | 1.0000     | -          |            |
| <b>395</b>     | 0.0159*      | 0.0079**   | 0.0079**   | 0.0079**   | 0.0079**   | 0.0079**   | -          |
| <b>Panel 2</b> | <b>Naïve</b> | <b>311</b> | <b>399</b> | <b>224</b> | <b>366</b> | <b>397</b> | <b>317</b> |
| <b>Naïve</b>   | -            |            |            |            |            |            |            |
| <b>311</b>     | 0.0079**     | -          |            |            |            |            |            |
| <b>399</b>     | 0.0079**     | 0.5476     | -          |            |            |            |            |
| <b>224</b>     | 0.0079**     | 0.4206     | 0.0556     | -          |            |            |            |
| <b>366</b>     | 0.0079**     | 0.0952     | 0.0318*    | 0.0079**   | -          |            |            |
| <b>397</b>     | 0.0079**     | 0.0952     | 0.0079**   | 0.0079**   | 0.6905     | -          |            |
| <b>317</b>     | 0.0079**     | 0.6905     | 0.6905     | 0.1508     | 0.0556     | 0.0079**   | -          |

**Supplementary Table 2. Additional isothermal titration calorimetry measurements for anti-NANP antibodies analyzed in this study.**

| mAb           | NPNA <sub>2</sub> |                      |                        |                         |                        | NPNA <sub>4</sub> |                      |                        |                         |                        | NPNA <sub>6</sub> |                      |                        |                         |                        |
|---------------|-------------------|----------------------|------------------------|-------------------------|------------------------|-------------------|----------------------|------------------------|-------------------------|------------------------|-------------------|----------------------|------------------------|-------------------------|------------------------|
|               | No. of sites      | $\Delta H$ (cal/mol) | $\Delta S$ (cal/mol·K) | -T $\Delta S$ (cal/mol) | - $\Delta G$ (cal/mol) | No. of sites      | $\Delta H$ (cal/mol) | $\Delta S$ (cal/mol·K) | -T $\Delta S$ (cal/mol) | - $\Delta G$ (cal/mol) | No. of sites      | $\Delta H$ (cal/mol) | $\Delta S$ (cal/mol·K) | -T $\Delta S$ (cal/mol) | - $\Delta G$ (cal/mol) |
| <b>Fab239</b> | 1.34 ± 0.01       | -17963 ± 23          | -31.9 ± 0.2            | 9511 ± 52               | -8452 ± 57             | 0.572 ± 0.011     | -46133 ± 437         | -120 ± 1.5             | 35679 ± 455             | -10454 ± 631           | 0.348 ± 0.005     | -74853 ± 179         | -214 ± 0.6             | 63903 ± 172             | -10950 ± 248           |
| <b>Fab311</b> | 1.27 ± 0.06       | -17990 ± 62          | -29.1 ± 0.3            | 8686 ± 96               | -9304 ± 114            | 0.578 ± 0.002     | -43303 ± 155         | -109 ± 1.2             | 32598 ± 144             | -10705 ± 212           | 0.386 ± 0.005     | -65990 ± 184         | -186 ± 1.0             | 55456 ± 298             | -10534 ± 350           |
| <b>Fab337</b> | 1.32 ± 0.02       | -16670 ± 87          | -29.3 ± 0.3            | 8726 ± 86               | -7944 ± 122            | 0.663 ± 0.006     | -37577 ± 5096        | -92 ± 15.3             | 27519 ± 4571            | -10058 ± 6846          | 0.480 ± 0.007     | -46407 ± 1529        | -122 ± 5.5             | 36474 ± 1642            | -9933 ± 2244           |
| <b>Fab356</b> | 1.29 ± 0.08       | -13543 ± 784         | -22.1 ± 2.5            | 6599 ± 757              | -6944 ± 1090           | 0.542 ± 0.006     | -38697 ± 492         | -97 ± 1.7              | 29020 ± 494             | -9677 ± 697            | 0.354 ± 0.001     | -58750 ± 95          | -163 ± 0.6             | 48499 ± 172             | -10251 ± 196           |
| <b>Fab364</b> | 1.41 ± 0.00       | -13877 ± 81          | -13.0 ± 0.3            | 3886 ± 75               | -9991 ± 110            | 0.634 ± 0.008     | -36087 ± 281         | -86 ± 0.9              | 25780 ± 277             | -10307 ± 395           | 0.445 ± 0.001     | -51720 ± 349         | -139 ± 1.2             | 41343 ± 344             | -10377 ± 490           |
| <b>Fab395</b> | 1.35 ± 0.02       | -14510 ± 403         | -24.8 ± 1.3            | 7404 ± 394              | -7106 ± 564            | 0.608 ± 0.032     | -36090 ± 3353        | -94 ± 11.9             | 28106 ± 3551            | -7984 ± 4884           | 0.432 ± 0.016     | -47443 ± 4643        | -132 ± 16.2            | 39256 ± 4820            | -8187 ± 6693           |
| <b>Fab224</b> | 1.59 ± 0.17       | -4811 ± 1147         | 6.1 ± 4.5              | -1819 ± 1343            | -6629 ± 197            | 1.26 ± 0.03       | -17267 ± 110         | -26.4 ± 0.6            | 7861 ± 180              | -9405 ± 70             | 0.749 ± 0.003     | -31000 ± 122         | -72.6 ± 0.5            | 21646 ± 155             | -9354 ± 35             |
| <b>Fab366</b> | 1.21 ± 0.03       | -14447 ± 605         | -21.6 ± 2.2            | 6430 ± 657              | -8017 ± 53             | 1.21 ± 0.01       | -17413 ± 176         | -32.1 ± 0.7            | 9561 ± 199              | -7853 ± 24             | 0.670 ± 0.005     | -33137 ± 231         | -82.2 ± 0.9            | 24508 ± 255             | -8629 ± 24             |
| <b>Fab397</b> | 1.18 ± 0.04       | -14883 ± 579         | -24.4 ± 2.1            | 7285 ± 613              | -7599 ± 34             | 1.3 ± 0.02        | -18963 ± 131         | -33.4 ± 0.4            | 9968 ± 120              | -8995 ± 31             | 0.730 ± 0.020     | -34947 ± 888         | -85.0 ± 3.1            | 25343 ± 930             | -9604 ± 50             |
| <b>Fab399</b> | 3.23 ± 0.32       | -1604 ± 206          | 16.9 ± 1.0             | -5039 ± 295             | -6642 ± 89             | 1.74 ± 0.08       | -8052 ± 667          | -3.1 ± 2.6             | 915 ± 772               | -7138 ± 107            | 0.737 ± 0.050     | -14867 ± 582         | -17.6 ± 2.4            | 5257 ± 716              | -9609 ± 187            |
| <b>Fab317</b> | 1.36 ± 0.09       | -14257 ± 1925        | -16.1 ± 7.6            | 4809 ± 2264             | -9448 ± 339            | 0.95 ± 0.01       | -19530 ± 255         | -32.8 ± 1.2            | 9769 ± 359              | -9761 ± 106            | 0.723 ± 0.042     | -24417 ± 1263        | -50.0 ± 4.2            | 14917 ± 1251            | -9499 ± 122            |

**Supplementary Table 3. X-ray data collection and refinement statistics.**

| Data collection                                                      | Fab399-NPNA <sub>6</sub>                         | Fab239-NPNA <sub>4</sub>                         | Fab366-NPNA <sub>3</sub>                      | Fab399-NPNA <sub>3</sub>                         |
|----------------------------------------------------------------------|--------------------------------------------------|--------------------------------------------------|-----------------------------------------------|--------------------------------------------------|
| Beamline                                                             | APS23-IDB                                        | SSRL12-2                                         | APS23-IDB                                     | APS23-IDB                                        |
| Wavelength (Å)                                                       | 1.03316                                          | 0.97946                                          | 1.03320                                       | 1.03324                                          |
| Space group                                                          | P2 <sub>1</sub>                                  | P2 <sub>1</sub>                                  | P2 <sub>1</sub> 2 <sub>1</sub> 2 <sub>1</sub> | P2 <sub>1</sub>                                  |
| Unit cell parameters (Å, °)                                          | a=62.97, b=85.90, c=89.46<br>α=90, β=100.3, γ=90 | a=82.16, b=55.70, c=115.73<br>α=90, β=98.9, γ=90 | a=59.66, b=68.71, c=108.79<br>α=β=γ=90        | a=63.40, b=87.60, c=89.65<br>α=90, β=101.0, γ=90 |
| Resolution (Å)                                                       | 50.00-2.10 (2.14-2.10) <sup>a</sup>              | 50.00-2.54 (2.58-2.54) <sup>a</sup>              | 50.00-1.60 (1.63-1.60) <sup>a</sup>           | 50.00-1.85 (1.88-1.85) <sup>a</sup>              |
| Unique Reflections                                                   | 49,542 (1,393) <sup>a</sup>                      | 31,852 (1,613) <sup>a</sup>                      | 56,859 (1,420) <sup>a</sup>                   | 80,717 (3,088) <sup>a</sup>                      |
| Redundancy                                                           | 2.4 (1.8) <sup>a</sup>                           | 3.7 (3.6) <sup>a</sup>                           | 11.7 (2.9) <sup>a</sup>                       | 3.0 (1.9) <sup>a</sup>                           |
| Completeness (%)                                                     | 89.1 (51.0) <sup>a</sup>                         | 91.9 (93.6) <sup>a</sup>                         | 95.1 (48.4) <sup>a</sup>                      | 97.2 (74.4) <sup>a</sup>                         |
| <I/σ <sub>I</sub> >                                                  | 10.3 (1.2) <sup>a</sup>                          | 7.9 (1.6) <sup>a</sup>                           | 28.9 (1.0) <sup>a</sup>                       | 18.6 (1.1) <sup>a</sup>                          |
| R <sub>sym</sub> <sup>b</sup> (%)                                    | 8.2 (40.7) <sup>a</sup>                          | 14.5 (89.8) <sup>a</sup>                         | 7.6 (55.9) <sup>a</sup>                       | 7.9 (48.4) <sup>a</sup>                          |
| R <sub>prim</sub> <sup>b</sup> (%)                                   | 6.0 (33.3) <sup>a</sup>                          | 8.2 (52.2) <sup>a</sup>                          | 2.2 (32.6) <sup>a</sup>                       | 5.2 (38.0) <sup>a</sup>                          |
| CC <sub>1/2</sub> <sup>c</sup> (%)                                   | 90.1 (71.5) <sup>a</sup>                         | 88.0 (52.1) <sup>a</sup>                         | 95.4 (71.9) <sup>a</sup>                      | 91.7 (69.2) <sup>a</sup>                         |
| <b>Refinement statistics</b>                                         |                                                  |                                                  |                                               |                                                  |
| Resolution (Å)                                                       | 44.01-2.10                                       | 32.81-2.54                                       | 45.05-1.60                                    | 46.75-1.85                                       |
| Reflections (work)                                                   | 49,513                                           | 31,820                                           | 56,784                                        | 80,521                                           |
| Reflections (test)                                                   | 2,434                                            | 1,591                                            | 2,793                                         | 3,869                                            |
| R <sub>cryst</sub> <sup>d</sup> / R <sub>free</sub> <sup>e</sup> (%) | 19.6/24.6                                        | 19.5/24.6                                        | 18.9/21.1                                     | 18.6/22.5                                        |
| <b>No. of atoms</b>                                                  |                                                  |                                                  |                                               |                                                  |
| Fab                                                                  | 6,502                                            | 6,475                                            | 3,325                                         | 6,645                                            |
| Peptide                                                              | 168                                              | 115                                              | 79                                            | 158                                              |
| Water                                                                | 347                                              | 106                                              | 265                                           | 367                                              |
| <b>Average B-value (Å<sup>2</sup>)</b>                               |                                                  |                                                  |                                               |                                                  |
| Fab                                                                  | 37                                               | 42                                               | 24                                            | 39                                               |
| Peptide                                                              | 44                                               | 36                                               | 31                                            | 41                                               |
| Water                                                                | 38                                               | 36                                               | 33                                            | 42                                               |
| Wilson B-value                                                       | 32                                               | 36                                               | 22                                            | 29                                               |
| <b>RMSD from ideal geometry</b>                                      |                                                  |                                                  |                                               |                                                  |
| Bond length (Å)                                                      | 0.005                                            | 0.002                                            | 0.007                                         | 0.007                                            |
| Bond angle (°)                                                       | 0.73                                             | 0.58                                             | 0.90                                          | 0.85                                             |
| <b>Ramachandran statistics<sup>f</sup></b>                           |                                                  |                                                  |                                               |                                                  |
| Favored (%)                                                          | 98.17                                            | 97.34                                            | 97.73                                         | 98.17                                            |
| Outliers (%)                                                         | 0.11                                             | 0.00                                             | 0.00                                          | 0.11                                             |

<sup>a</sup> Numbers in parentheses refer to the highest resolution shell.

<sup>b</sup>  $R_{sym} = \sum_{hkl} \sum_i |I_{hkl} - \langle I_{hkl} \rangle| / \sum_{hkl} \sum_i I_{hkl}$  and  $R_{prim} = \sum_{hkl} (1/(n-1))^{1/2} \sum_i |I_{hkl} - \langle I_{hkl} \rangle| / \sum_{hkl} \sum_i I_{hkl}$ , where  $I_{hkl}$  is the scaled intensity of the  $i^{\text{th}}$  measurement of reflection  $h, k, l$ ,  $\langle I_{hkl} \rangle$  is the average intensity for that reflection, and  $n$  is the redundancy.

<sup>c</sup>  $CC_{1/2} = \text{Pearson correlation coefficient between two random half datasets.}$

<sup>d</sup>  $R_{cryst} = \sum_{hkl} |F_o - F_c| / \sum_{hkl} |F_o| \times 100$ , where  $F_o$  and  $F_c$  are the observed and calculated structure factors, respectively.

<sup>e</sup>  $R_{free}$  was calculated as for  $R_{cryst}$ , but on a test set comprising 5% of the data excluded from refinement.

<sup>f</sup> From MolProbity<sup>1</sup>.

**Supplementary Table 4. X-ray data collection and refinement statistics (continued).**

| Data collection                                                      | Fab239-NPNA <sub>2</sub>            | Fab356-NPNA <sub>2</sub>                      | Fab364-NPNA <sub>2</sub>                | Fab395-NPNA <sub>2</sub>                      | Fab224-NPNA <sub>4</sub>                         |
|----------------------------------------------------------------------|-------------------------------------|-----------------------------------------------|-----------------------------------------|-----------------------------------------------|--------------------------------------------------|
| Beamline                                                             | APS23-IDD                           | APS23-IDD                                     | APS23-IDD                               | APS23-IDD                                     | APS23-IDD                                        |
| Wavelength (Å)                                                       | 1.03321                             | 1.03321                                       | 1.03320                                 | 1.03324                                       | 1.03324                                          |
| Space group                                                          | P4 <sub>3</sub> 2 <sub>1</sub> 2    | P2 <sub>1</sub> 2 <sub>1</sub> 2 <sub>1</sub> | C222 <sub>1</sub>                       | P2 <sub>1</sub> 2 <sub>1</sub> 2 <sub>1</sub> | P2 <sub>1</sub>                                  |
| Unit cell parameters (Å, °)                                          | a= b=121.52, c=82.61<br>α= β=γ=90   | a=64.14, b=81.76, c=84.05<br>α=β= γ=90        | a=80.44, b=117.05, c=116.91<br>α=β=γ=90 | a=60.42, b=78.66, c=90.67<br>α=β=γ=90         | a=42.92, b=67.34, c=84.77<br>α=90, β= 96.1, γ=90 |
| Resolution (Å)                                                       | 50.00-1.85 (1.88-1.85) <sup>a</sup> | 50.00-2.52 (2.56-2.52) <sup>a</sup>           | 50.00-2.10 (2.14-2.10) <sup>a</sup>     | 50.00-2.60 (2.64-2.60) <sup>a</sup>           | 50.00-1.23 (1.25-1.23) <sup>a</sup>              |
| Unique Reflections                                                   | 52,998 (2,623) <sup>a</sup>         | 15,560 (773) <sup>a</sup>                     | 28,464 (556) <sup>a</sup>               | 13,944 (675) <sup>a</sup>                     | 114,397 (855) <sup>a</sup>                       |
| Redundancy                                                           | 13.3 (9.8) <sup>a</sup>             | 7.0 (6.2) <sup>a</sup>                        | 5.3 (1.8) <sup>a</sup>                  | 6.7 (6.9) <sup>a</sup>                        | 2.9 (1.0) <sup>a</sup>                           |
| Completeness (%)                                                     | 100.0 (100.0) <sup>a</sup>          | 100.0 (100.0) <sup>a</sup>                    | 86.3 (34.8) <sup>a</sup>                | 99.9 (100.0) <sup>a</sup>                     | 81.7 (12.4) <sup>a</sup>                         |
| <I/σ <sub>I</sub> >                                                  | 18.6 (1.9) <sup>a</sup>             | 13.6 (1.6) <sup>a</sup>                       | 13.3 (2.0) <sup>a</sup>                 | 8.0 (2.0) <sup>a</sup>                        | 19.1 (1.4) <sup>a</sup>                          |
| R <sub>sym</sub> <sup>b</sup> (%)                                    | 18.8 (93.3) <sup>a</sup>            | 14.4 (105.3) <sup>a</sup>                     | 10.8 (40.0) <sup>a</sup>                | 21.6 (124.4) <sup>a</sup>                     | 5.4 (35.7) <sup>a</sup>                          |
| R <sub>rim</sub> <sup>b</sup> (%)                                    | 5.3 (30.3) <sup>a</sup>             | 5.8 (45.5) <sup>a</sup>                       | 4.8 (31.3) <sup>a</sup>                 | 9.0 (52.3) <sup>a</sup>                       | 3.4 (35.3) <sup>a</sup>                          |
| CC <sub>1/2</sub> <sup>c</sup> (%)                                   | 95.1 (72.5) <sup>a</sup>            | 90.0 (54.7) <sup>a</sup>                      | 93.4 (73.8) <sup>a</sup>                | 88.3 (49.6) <sup>a</sup>                      | 89.3 (67.4) <sup>a</sup>                         |
| <b>Refinement statistics</b>                                         |                                     |                                               |                                         |                                               |                                                  |
| Resolution (Å)                                                       | 48.97-1.85                          | 43.27-2.52                                    | 43.85-2.10                              | 47.92-2.60                                    | 42.68-1.23                                       |
| Reflections (work)                                                   | 52,931                              | 15,512                                        | 28,419                                  | 13,902                                        | 114,353                                          |
| Reflections (test)                                                   | 2577                                | 748                                           | 1,431                                   | 699                                           | 5,705                                            |
| R <sub>cryst</sub> <sup>d</sup> / R <sub>free</sub> <sup>e</sup> (%) | 18.7/20.6                           | 20.9/25.6                                     | 21.3/25.6                               | 19.8/24.4                                     | 16.9/18.3                                        |
| <b>No. of atoms</b>                                                  |                                     |                                               |                                         |                                               |                                                  |
| Fab                                                                  | 6,499                               | 3,281                                         | 3,135                                   | 3,202                                         | 3,355                                            |
| Peptide                                                              | 107                                 | 56                                            | 56                                      | 43                                            | 84                                               |
| Protein G                                                            | 882                                 | N/A                                           | 453                                     | N/A                                           | N/A                                              |
| Water                                                                | 349                                 | 22                                            | 123                                     | 60                                            | 491                                              |
| <b>Average B-value (Å<sup>2</sup>)</b>                               |                                     |                                               |                                         |                                               |                                                  |
| Fab                                                                  | 24                                  | 56                                            | 53                                      | 41                                            | 18                                               |
| Peptide                                                              | 17                                  | 75                                            | 78                                      | 45                                            | 17                                               |
| Protein G                                                            | 26                                  | N/A                                           | 45                                      | N/A                                           | N/A                                              |
| Water                                                                | 28                                  | 46                                            | 42                                      | 30                                            | 30                                               |
| Wilson B-value                                                       | 20                                  | 48                                            | 37                                      | 37                                            | 11                                               |
| <b>RMSD from ideal geometry</b>                                      |                                     |                                               |                                         |                                               |                                                  |
| Bond length (Å)                                                      | 0.009                               | 0.004                                         | 0.004                                   | 0.002                                         | 0.006                                            |
| Bond angle (°)                                                       | 0.87                                | 0.66                                          | 0.67                                    | 0.60                                          | 0.85                                             |
| <b>Ramachandran statistics<sup>f</sup></b>                           |                                     |                                               |                                         |                                               |                                                  |
| Favored (%)                                                          | 97.79                               | 96.58                                         | 95.18                                   | 95.83                                         | 97.77                                            |
| Outliers (%)                                                         | 0.00                                | 0.00                                          | 0.21                                    | 0.23                                          | 0.00                                             |

<sup>a</sup> Numbers in parentheses refer to the highest resolution shell.

<sup>b</sup>  $R_{sym} = \sum_i \sum_j |I_{hklj} - \langle I_{hkl} \rangle| / \sum_i \sum_j I_{hklj}$  and  $R_{rim} = \sum_i \sum_j (1/(n-1))^{1/2} \sum_l |I_{hklj} - \langle I_{hkl} \rangle| / \sum_i \sum_j I_{hklj}$ , where  $I_{hklj}$  is the scaled intensity of the  $j^{\text{th}}$  measurement of reflection  $h, k, l$ ,  $\langle I_{hkl} \rangle$  is the average intensity for that reflection, and  $n$  is the redundancy.

<sup>c</sup>  $CC_{1/2}$  = Pearson correlation coefficient between two random half datasets.

<sup>d</sup>  $R_{cryst} = \sum_i |F_o - F_c| / \sum_i |F_o| \times 100$ , where  $F_o$  and  $F_c$  are the observed and calculated structure factors, respectively.

<sup>e</sup>  $R_{free}$  was calculated as for  $R_{cryst}$ , but on a test set comprising 5% of the data excluded from refinement.

<sup>f</sup> From MolProbity<sup>1</sup>.

**Supplementary Table 5. Germline genes and buried surface area (BSA) of mAbs analyzed in this study.**

| mAb             | HC V gene (IGVH)                             | HC D gene | HC J gene         | LC V gene (IGKV, IGLV)     | LC J gene                      | HC BSA (Å <sup>2</sup> ) | LC BSA (Å <sup>2</sup> ) | Total BSA (Å <sup>2</sup> ) |
|-----------------|----------------------------------------------|-----------|-------------------|----------------------------|--------------------------------|--------------------------|--------------------------|-----------------------------|
| 239             | 3-33*03 or*04                                | D2-21*02  | J5*01             | KV1-5*01 or<br>KV1-5*03    | KJ2*02 or<br>KJ5*01            | 386                      | 164                      | 550                         |
| 311             | 3-33*01 or *06                               | D3-22*01  | J4*02 or<br>J4*03 | LV1-40*01 or<br>LV1-40*02  | LJ3*02                         | 366                      | 107                      | 473                         |
| 337             | 3-33*03,<br>3-30*04, *14 or *16<br>3-30-3*03 | D2-21*01  | J3*02             | KV3-15*01                  | KJ1*01                         | N/A                      | N/A                      | N/A                         |
| 356             | 3-33*03                                      | D3-22*01  | J4*02 or<br>J4*03 | KV3-15*01                  | KJ3*01                         | 457                      | 115                      | 572                         |
| 364             | 3-33*03,<br>3-30*02, or<br>3-30-5*02         | D4-17*01  | J4*02             | KV1-5*03                   | KJ1*01                         | 344                      | 99                       | 443                         |
| 395             | 3-33*03                                      | D3-9*01   | J4*02 or<br>J4*03 | KV1-5*01                   | KJ1*01                         | 379                      | 41                       | 420                         |
| 224             | 3-49*04                                      | D4-17*01  | J6*01             | LV1-40*01                  | LJ3*02                         | 429                      | 188                      | 617                         |
| 399             | 3-49*03                                      | -         | J2*01             | KV2-29*02 or<br>KV2D-29*02 | KJ1*01                         | 314                      | 178                      | 492                         |
| 366             | 1-2*02                                       | D2-21*01  | J3*02             | KV1-27*01                  | KJ1*01                         | 348                      | 228                      | 576                         |
| 317<br>(VH3-30) | 3-30*14 or *16                               | D3-16*01  | IJ4*02            | KV1-5*01                   | KJ1*01                         | 310                      | 209                      | 519                         |
| 397<br>(VH3-15) | 3-15*01                                      | D3-3*01   | J4*02 or<br>J4*03 | KV2-28*01 or<br>KV2D-28*01 | KJ1*01,<br>KJ2*01 or<br>KJ5*01 | 264                      | 329                      | 593                         |

**Supplementary Table 6. Conserved positions and corresponding residues of *IGHV3-33* mAbs that interact with NPNA peptide**

| mAb        | 227 | 239        | 311        | 337† | 356        | 364 | 395             | Germline residue | Interaction         |
|------------|-----|------------|------------|------|------------|-----|-----------------|------------------|---------------------|
| H 31 (32)‡ | A   | N          | N          | T    | N*         | G   | C               | S                | Conserved MHB       |
| H 32 (33)‡ | F   | F          | Y          | Y    | F          | Y   | Y               | Y                | Conserved vdW       |
| H 33 (34)‡ | G   | G          | G          | G    | G          | G   | G               | G                | Conserved MHB       |
| H 50       | V   | V          | I          | L    | V          | I   | V               | V                | Evolved vdW         |
| H 52       | W   | W          | W          | W    | W          | W   | W               | W                | Conserved CH-pi     |
| H 52A      | Y   | H          | Y          | H    | H          | F   | H<br>(also SHB) | Y                | Conserved MHB       |
| H 58       | Y   | F          | F          | F    | F          | Y   | H               | Y                | Conserved vdW       |
| H 95       | V   | D<br>(SHB) | A<br>(MHB) | D    | D<br>(SHB) | V   | A<br>(MHB)      | -                | Varied as indicated |

\*The main chain of <sup>31</sup>HAsn in mAb356 does not form a hydrogen bond with the peptide.

†Residues in 337 are included for complete comparison but are in grey as no structure of this mAb is available.

‡Residue number for mAb395.

MHB = Hydrogen bond between the Fab main chain and NANP peptide.

SHB = Hydrogen bond between the Fab side chain and NANP peptide.

vdW = van der Waals interaction.



## Supplementary reference

- 1 Chen, V. B. *et al.* MolProbity: all-atom structure validation for macromolecular crystallography. *Acta Crystallogr D Biol Crystallogr* **66**, 12-21 (2010).
